# Supplementary material for: Urolithin A Is a Dietary Microbiota-Derived Human Aryl Hydrocarbon Receptor Antagonist
Source: PubMed Central journal article supplement (PMC6315438; doi:10.3390/metabo8040086), 2018-11-29
Supplement: metabolites-08-00086-s001.pdf [file metabolites-08-00086-s001.pdf]

SUPPLEMENTARY MATERIAL

## Urolithin A Is a Dietary Microbiota-Derived Human Aryl Hydrocarbon Receptor Antagonist

Gulsum E. Muku <sup>1,2</sup>, Iain A. Murray <sup>1</sup>, Juan C. Espín <sup>3</sup> and Gary H. Perdew <sup>1,\*</sup>

<sup>1</sup> Center for Molecular Toxicology and Carcinogenesis, Department of Veterinary and Biomedical Sciences, The Pennsylvania State University, University Park, PA 16802, USA; [gem186@psu.edu](mailto:gem186@psu.edu) (G.E.M.); [iam1@psu.edu](mailto:iam1@psu.edu) (I.A.M.)

<sup>2</sup> The Huck Institutes of the Life Sciences, The Pennsylvania State University, University Park, PA 16802, USA

<sup>3</sup> Laboratory of Food & Health, Research Group on Quality, Safety and Bioactivity of Plant Foods, Department of Food Science and Technology, CEBAS-CSIC, 30100 Murcia, Spain; [jcespin@cebas.csic.es](mailto:jcespin@cebas.csic.es)

\* Correspondence: [ghp2@psu.edu](mailto:ghp2@psu.edu); Tel.: +1-814-865-0400

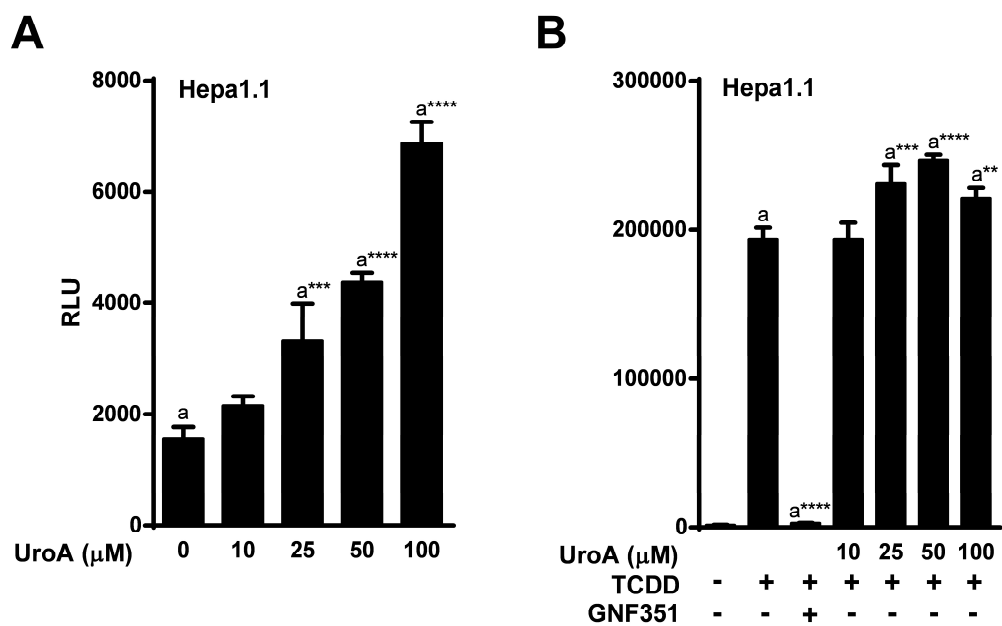

**Figure S1.** The agonist and antagonist activity of UroA was assessed in Hepa1.1 at higher doses. (A) Hepa1.1 cells were treated with 10, 25, 50, 100  $\mu\text{M}$  of UroA in the absence of exogenous ligands or (B) in the presence of TCDD for 4 h.

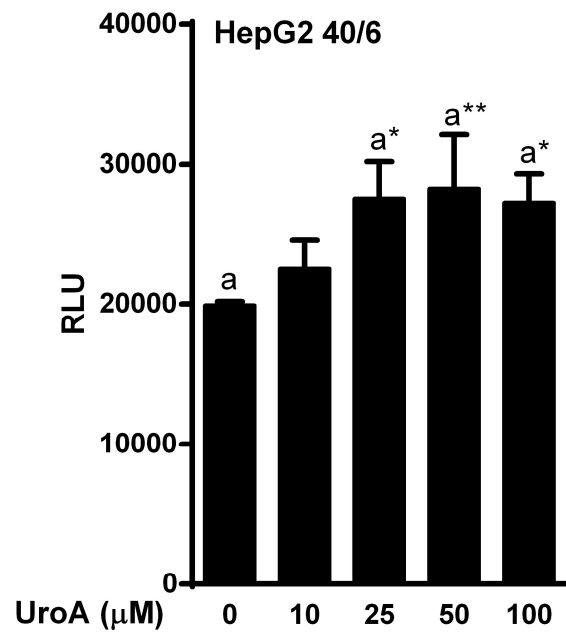

**Figure S2.** The agonist activity of UroA was assessed in HepG2 40/6 at higher doses. (A) HepG2 40/6 cells were treated with 10, 25, 50, 100 μM of UroA in the absence of exogenous ligands for 4 h.

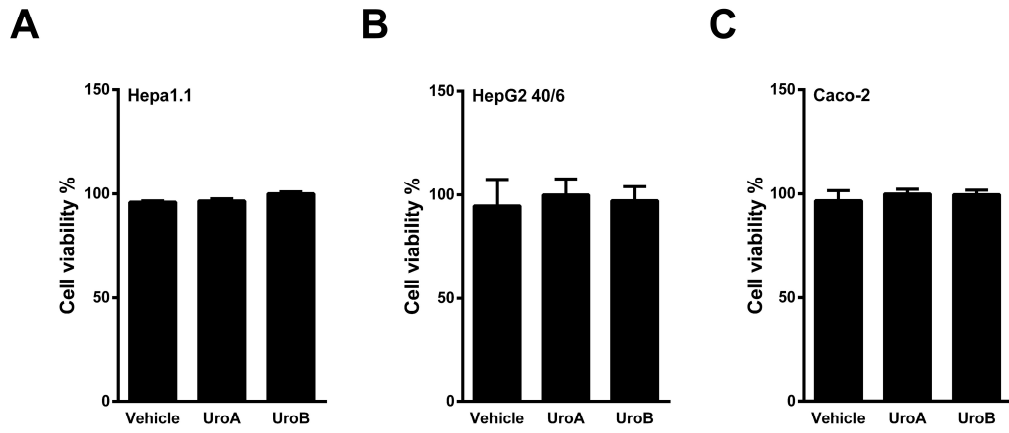

**Figure S3.** UroA does not cause cytotoxicity in Hepa1.1, HepG2 (40/6) or Caco-2 cells. MTT assay was performed on (a) Hepa1.1 or HepG2 (40/6) cells treated with 10  $\mu$ M of UroA or B for 4 h, (b) Caco-2 cells treated with 10  $\mu$ M of UroA for 16 h.
